# Supplementary material
Source: PubMed Central journal article supplement (PMC5500146)
Supplement: 1495File002.pdf [file 1495File002.pdf]

1  
2  
3  
4  
5  
6  
7  
8  
9  
10  
11  
12  
13  
14  
15  
16  
17  
18

## SUPPLEMENTAL INFORMATION

### Functional equivalence of the SOX2 and SOX3 transcription factors in the developing mouse brain and testes

Fatwa Adikusuma<sup>1,2</sup>, Daniel Pederick<sup>1</sup>, Dale McAninch<sup>1</sup>, James Hughes<sup>1</sup> and Paul  
Thomas<sup>1\*</sup>

<sup>1</sup>School of Biological Sciences and The Robinson Research Institute, University of  
Adelaide, Adelaide, SA, AUS 5005

<sup>2</sup>CEBIOR, Faculty of Medicine, Diponegoro University, Semarang, Indonesia, 50271

<sup>3</sup>South Australian Health and Medical Research Institute, Adelaide, SA, AUS, 5000

***\*Corresponding author:***

Email: [paul.thomas@adelaide.edu.au](mailto:paul.thomas@adelaide.edu.au)

## 19 **Supplemental Experimental Procedures**

### 20 **gDNA preparation and PCR genotyping**

21 gDNA was collected from tail tissues and extracted using High Pure PCR Template  
22 Preparation Kit (Roche). To screen for *Sox3*<sup>Sox2KI</sup> founders, PCR was performed using  
23 F: 5'-CCTGCTGAAACATTCCCTGT-3' and R: 5'-TTCAGCTCCGTCTCCATCAT-3'. PCR  
24 products from desired founders were Sanger sequenced to identify specific  
25 mutations. Large deletions resulting from two gRNA cuts were detected using  
26 primers F: 5'-CCTGCTGAAACATTCCCTGT-3' and R: 5'-ACAAAACCCCGACAGTTACG-3'.  
27 For routine genotyping of *Sox3*<sup>Sox2KI</sup> mice, multiplex PCR was performed using  
28 primers F1: 5'-CACAACTCCGAGATCAGCAA-3', F2: 5'-GAACGCATCAGGTGAGAGAAG-  
29 3', R1: 5'-CGGCGTTCATGTAGCTCTG-3' and R2: 5'-TTCAGCTCCGTCTCCATCAT-3'. For  
30 routine genotyping of *Sox3*<sup>KO</sup> mice, primers F1: 5'-CAGCATGTACCTGCCACCT-3', F2:  
31 5'-CCCGATCTGAGCAGGTAT-3' and R: 5'-ACAAAACCCCGACAGTTACG-3' were used.

32

### 33 **RNA preparation and qPCR**

34 RNA was extracted using Trizol (Invitrogen), purified using Rneasy mini kit (Qiagen)  
35 after DNase treatment on column using RNase-Free DNase Set (Qiagen). cDNA was  
36 generated using a High Capacity RNA-to-cDNA kit (Applied Biosystems) for qPCR  
37 analyses using Fast SYBR Green Master Mix (Applied Biosystems ) on an Applied  
38 Biosystems 7500 StepOnePlus machine. Primers used for qPCR are as follows:  
39 *Actβ* F: 5'-CTGCCTGACGGCCAGG-3', R: 5'-GATTCCATACCCAAGAAGGAAGG-3'

40 *Sox2* ORF F: 5'-ACCAGCTCGCAGACCTACAT-3' R: 5'-TCGGACTTGACCACAGAGC-3'

41 *Sox3* 3'UTR F: 5'-AACCTAGGAATCCGGGAAGA-3' R: 5'-CGTAACTGTCCGGGTTTTGT-3'

42 *Sox2* 3'UTR F: 5'-TTCGAGGAAAGGGTTCTTGCTG-3' R: 5'-

43 CCTTCCTTGTGGTAACGGTCCT-3' *Sox1* F: 5'- CCCTCGGATCTCTGGTCA -3' R: 5'-

44 GCAGGTACATGCTGATCATCTC-3'

45 *Ngn3*: F: 5'-CCCCAGAGACACAACAACCT-3' R: 5'-AGTCACCCACTTCTGCTTCG-3'

46 *Gfra1* F: 5'-ATCGGGCAGTACACATCTCTG-3' R: 5'-TGTGGTTATGTGGCTGGAGG-3'

47 *Tgfb1* F: 5'-TGAAGCGTTCCAAGCCATGC-3' R: 5'-GATGCCTCCGCTAACCAGGATT-3'

48 *Egr3* F: 5'-TCAACCTCTTCTCCGGCAGC-3' R: 5'-GATTGGGCTTCTCGTTGGTCA-3'

49 *Scube3* F: 5'-CTGGCACATGACGGACACAAC-3' R: 5'-CGTAGCTGCCCATCATGTTGAC-3'

50

## 51 **Tissue collection and Immunofluorescence**

52 Tissues were fixed overnight in 4% PFA and equilibrated in 30% sucrose. Tissues

53 were then embedded in OCT compound (Sakura Finetek) for cryosectioning using

54 Leica CM1900 at 10-14  $\mu$ m. For immunohistochemistry, tissue slides were blocked

55 using PBS/0.3% Triton X-100/10% horse serum before primary antibodies were

56 added for overnight incubation at 4  $^{\circ}$ C. Slides were then washed in PBS and

57 incubated with secondary antibodies for 2 hours at room temperature. Slides were

58 mounted using Prolong Gold Antifade plus DAPI (Molecular Probes, Invitrogen) and

59 imaged using a Nikon Eclipse Ti microscope. Primary antibodies were SOX3 (R&D

60 AF2569, 1:200), SOX2 (Santa Cruz SOX2 Y-17 sc-17320, 1:100, used for testes), SOX2  
61 (Millipore Ab5603, 1:1000, used for embryonic brain). Secondary antibodies were  
62 donkey anti-goat 488 (Life Technologies) and donkey anti-rabbit TxRed (Life  
63 Technologies).

64

#### 65 **Quantification of SOX2 protein using immunohistochemistry**

66 Immunostaining was described as above and images acquired using an Leica SP5  
67 spectral scanning confocal microscope. The mean SOX3 and SOX2 staining intensity  
68 was calculated in at least 100 cells/embryo using NIS Elements Advance Research Software  
69 (Nikon). Raw data was transferred to GraphPad Prism 7 where it was transformed such that  
70 cells with mean SOX3 intensity 5x above background were deemed SOX3 positive cells. The  
71 remaining cells were deemed SOX3 negative. Students unpaired T-test was performed to  
72 test significance.

73

#### 74 **Calculation of relative *Sox2/Sox3* levels**

75 Quantitation of transcripts from the *Sox2* and *Sox3* locus in WT and *Sox3*<sup>*Sox2KI*</sup> reveals  
76 that the *Sox3*<sup>*Sox2KI*</sup> locus is producing *Sox2* ORF transcripts at 60% of the normal level  
77 of *Sox3* transcript based on a 5'UTR PCR. This additional *Sox2* ORF increases the total  
78 *Sox2* ORF transcript pool by approximately 40% in *Sox3*<sup>*Sox2KI*</sup> embryonic heads. Since  
79 the rise in *Sox2* transcripts is less than expected based on the contribution from the  
80 *Sox3*<sup>*Sox2KI*</sup> locus this implies that the *Sox2* locus contributes approximately 60% of the  
81 total *Sox2/3* transcript pool in the developing brain. Combined *Sox2/3* levels in

82 *Sox3*<sup>*Sox2KI/Y*</sup> mice can be calculated as follows: *Sox2* locus (60%) + *Sox3* locus (60% x  
83 40%) = 60% + 24% = 84%. This amounts to a 16% reduction compared with WT  
84 levels.

85

#### 86 **Purification of spermatogonia**

87 Testes from post-natal day 6 mice were isolated, de-capsulated, and incubated for  
88 15 min each in 0.5 mg/ml collagenase/DMEM with agitation and then in 0.25%  
89 trypsin/EDTA in DMEM. Tubules were dissociated manually by pipetting and washed  
90 in 0.5% BSA in DMEM by centrifugation. Cell pellets were resuspended in DMEM and  
91 filtered twice through a 70 µm membrane, then separated over a 2-4% BSA gradient.  
92 Purified spermatogonia were identified by GCNA1 staining.

93

94

95

96

97

98

99

100

101 **Supplementary Figures**

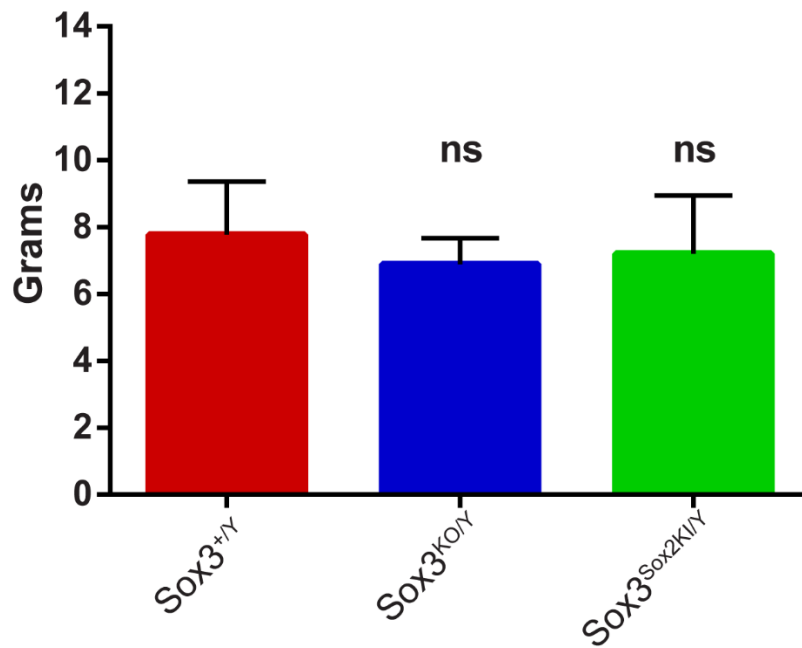

102

103 **Supplementary Figure 1**

104 **Male wean weights were unchanged in mutant mice.**

105 Male mice were weighed at weaning (3 weeks). At least 14 mice of each genotype

106 were weighed and unpaired t-tests were performed to assess pairwise differences

107 with respect to Sox3<sup>+/+</sup>

108

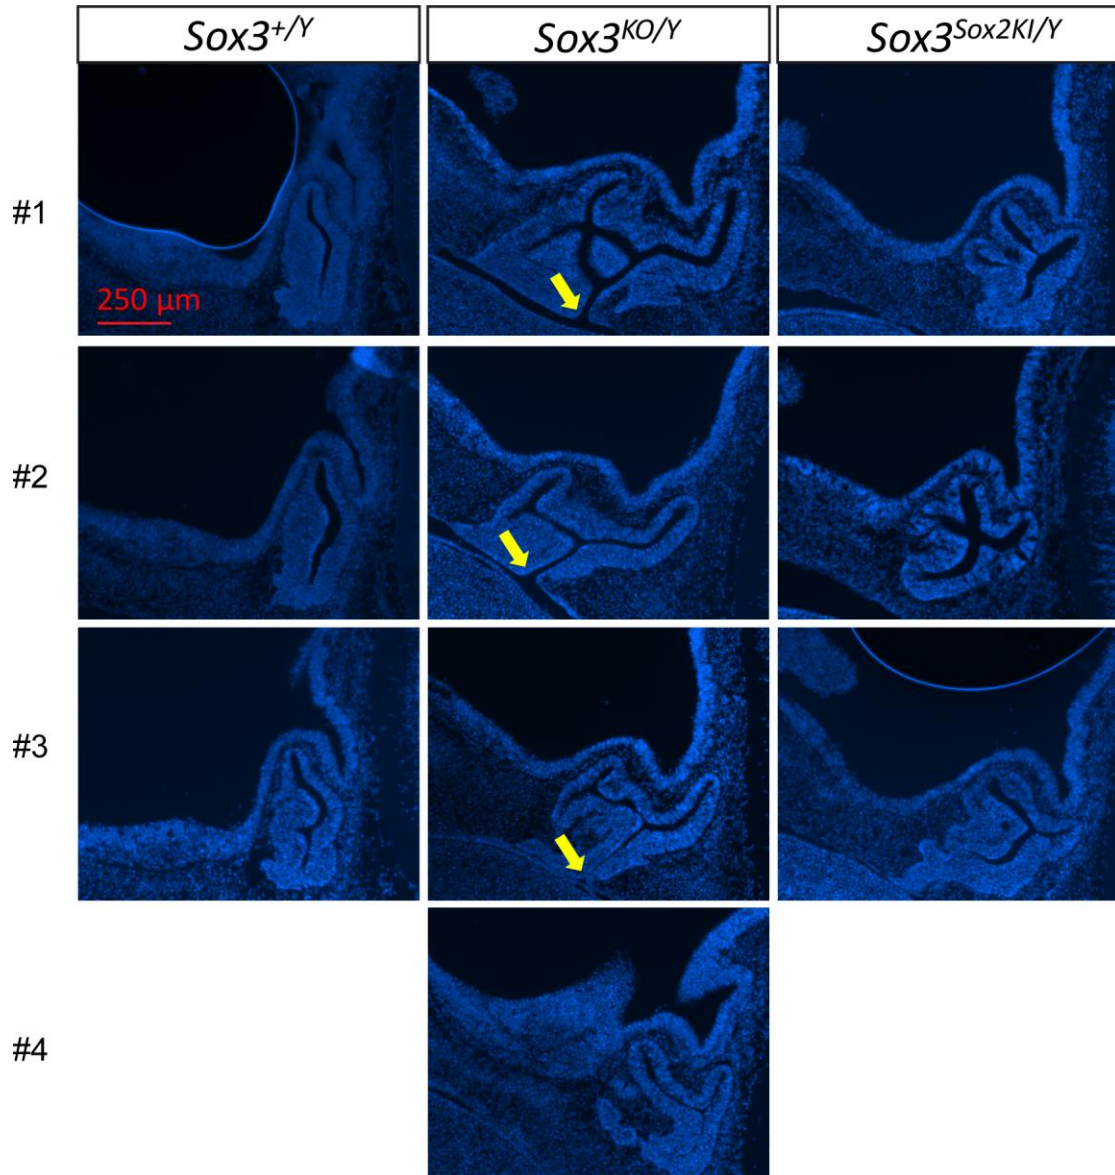

109

110

111 **Supplementary Figure 2**

112 **Sox2KI largely rescues embryonic Sox3-null Rathke's pouch**

113 DAPI staining of midline sagittal sections of *Sox3*<sup>+/*Y*</sup>, *Sox3*<sup>KO/*Y*</sup> and *Sox3*<sup>Sox2KI/*Y*</sup> 12.5 dpc

114 embryos (*n*=3 per genotype) showing rescue of the *Sox3*<sup>KO/*Y*</sup> pituitary induction

115 phenotype. Arrows indicate failure of the Rathke's pouch to separate from the oral

116 cavity. See Fig. 2C for further details.

A

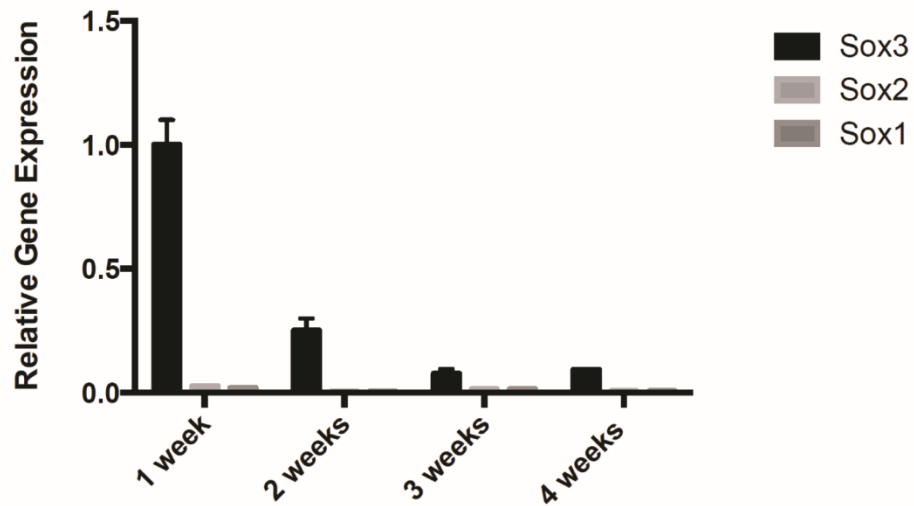

B

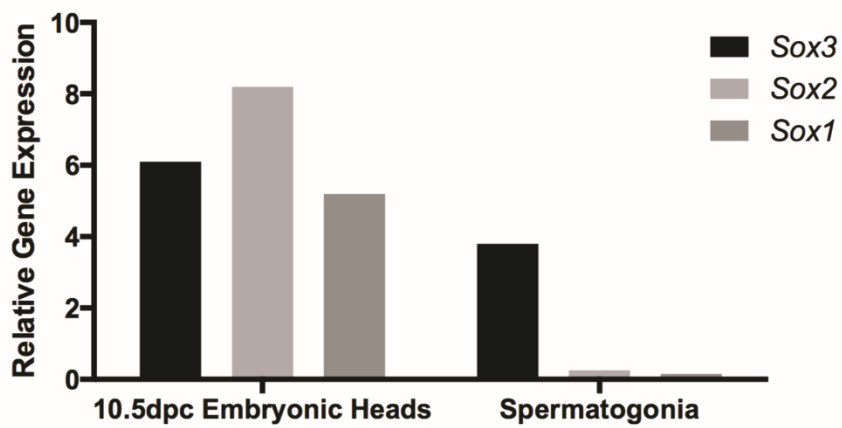

118

119 **Supplementary Figure 3**120 **Sox1 and Sox2 are not detectable in the testes.**121 (A) Expression of *Sox1*, *Sox2* and *Sox3* was measured by qPCR in the testes at various122 ages ( $n=3$ ). Expression levels were normalised to *Sox3* levels in 1 week old testes. (B)

123 Expression levels were also compared between 10.5 dpc embryonic heads and

124 purified postnatal day 6 spermatogonia.
